# Supplementary material for: The Theobroma cacao B3 domain transcription factor TcLEC2 plays a duel role in control of embryo development and maturation
Source: PubMed Central journal article supplement (PMC4021495; doi:10.1186/1471-2229-14-106), 2014-04-24
Supplement: 1471-2229-14-106-S1.pdf [file 1471-2229-14-106-S1.pdf]

**Additional file 1. Correspondent gene comparison from Criollo and Forastero genome database.**

| Criollo Genes | Forastero Genes | E-values  |
|---------------|-----------------|-----------|
| Tc06_g015590  | Thecc1EG029838  | 0         |
| Tc04_g004970  | Thecc1EG017321  | 4.00E-159 |
| Tc01_g024700  | Thecc1EG003056  | 0         |
| Tc09_g035210  | Thecc1EG042290  | 0         |
| Tc04_g016290  | Thecc1EG019701  | 0         |
| Tc06_g016770  | Thecc1EG029976  | 0         |
| Tc07_g007150  | Thecc1EG031311  | 0         |
| Tc00_g048490  | Thecc1EG005014  | 0         |
| Tc05_g010460  | Thecc1EG022729  | 2.00E-105 |
| Tc02_g034560  | Thecc1EG011862  | 0         |
| Tc03_g022470  | Thecc1EG015590  | 0         |
| Tc01_g015370  | Thecc1EG040397  | 0         |
| Tc04_g015240  | Thecc1EG019508  | 0         |
