# Supplementary material for: The Theobroma cacao B3 domain transcription factor TcLEC2 plays a duel role in control of embryo development and maturation
Source: PubMed Central journal article supplement (PMC4021495; doi:10.1186/1471-2229-14-106), 2014-04-24

**Additional file 5. Relative transient GFP expression levels of TcLEC2 transformation in SE compared to PSUSCA6.**

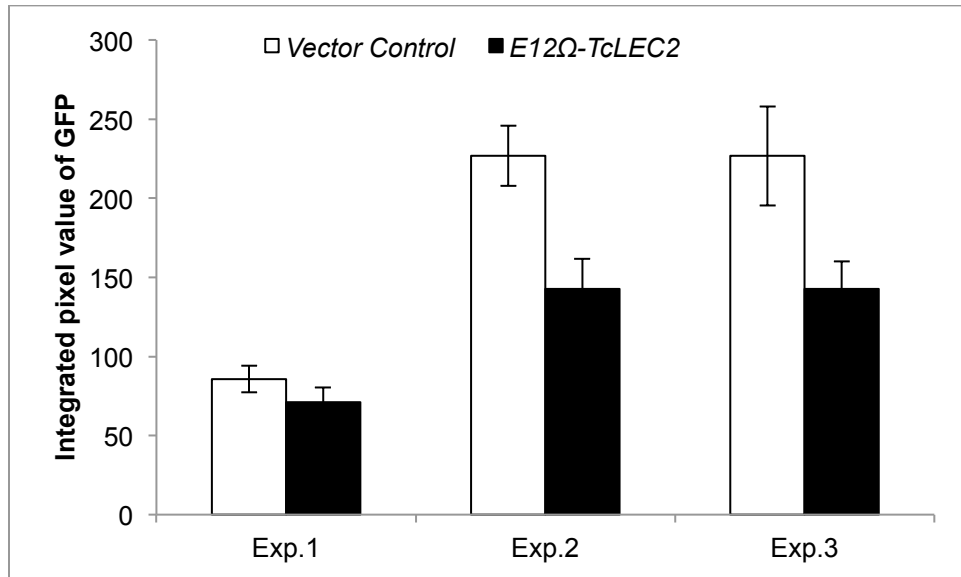

Supplement: 1471-2229-14-106-S5.pdf [file 1471-2229-14-106-S5.pdf]
