# Supplementary material for: The Theobroma cacao B3 domain transcription factor TcLEC2 plays a duel role in control of embryo development and maturation
Source: PubMed Central journal article supplement (PMC4021495; doi:10.1186/1471-2229-14-106), 2014-04-24

**Additional file 6. Comparison of average of total number of non-transgenic embryo produced per cotyledonary explant.** Sixteen pieces of cotyledonary explants were placed on each media plate. Three or four plates (taken as biological replicates) were used for transient transformation of control vector or E12 $\Omega$ ::TcLEC2 in each transformation trial (n=3 or 4, mean  $\pm$  SE). **A.** Transformation trial 1 (n=3). **B.** Transformation trial 2 (n=4). **C.** Transformation trial 3 (n=4).

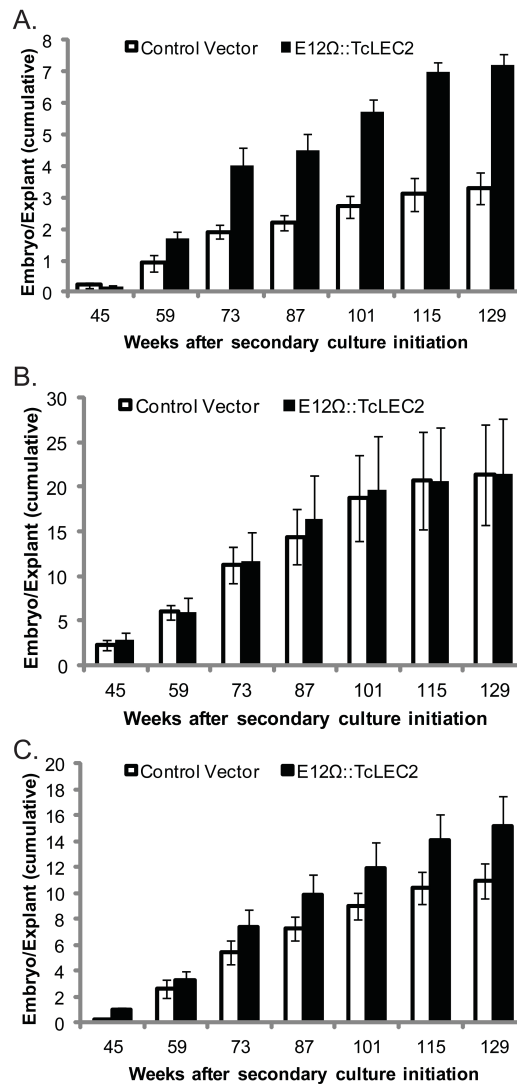

Supplement: 1471-2229-14-106-S6.pdf [file 1471-2229-14-106-S6.pdf]
