# Supplementary material for: The Theobroma cacao B3 domain transcription factor TcLEC2 plays a duel role in control of embryo development and maturation
Source: PubMed Central journal article supplement (PMC4021495; doi:10.1186/1471-2229-14-106), 2014-04-24

**Additional file 7. Overexpression of control vector and E12 $\Omega$ ::TcLEC2 in cacao zygotic embryo transient assay.** Fluorescent micrographs of GFP expression (visualization marker) in leaves were captured five days after transformation (Bars = 2mm). **A&B.** IZE transformed with control vector with white light and GFP fluorescence imaging. **C&D.** IZE transformed with E12 $\Omega$ ::TcLEC2 with white light and GFP fluorescence imaging.

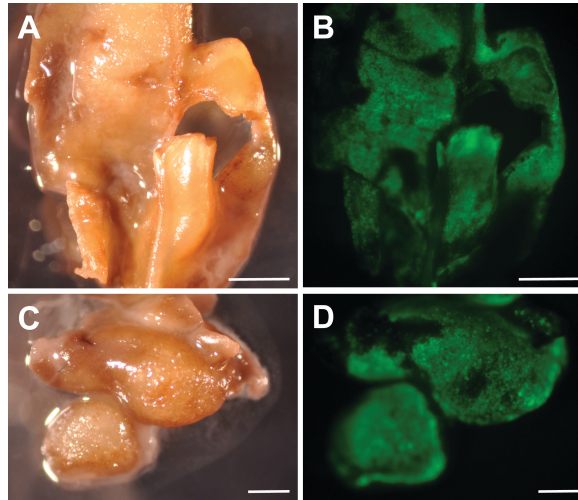

Supplement: 1471-2229-14-106-S7.pdf [file 1471-2229-14-106-S7.pdf]
