# Supplementary material for: The Theobroma cacao B3 domain transcription factor TcLEC2 plays a duel role in control of embryo development and maturation
Source: PubMed Central journal article supplement (PMC4021495; doi:10.1186/1471-2229-14-106), 2014-04-24
Supplement: 1471-2229-14-106-S8.pdf [file 1471-2229-14-106-S8.pdf]

**Additional file 8. List of fatty acid biosynthesis related genes in cacao.** The expression of these genes were compared in cacao IZE transiently overexpressing control vector and E12 $\Omega$ ::TcLEC2.

| Gene             | Tc_ID              |
|------------------|--------------------|
| <i>TcKASII</i>   | <i>Tc09g006480</i> |
| <i>TcFAB2.2</i>  | <i>Tc04g017510</i> |
| <i>TcFAB2.7</i>  | <i>Tc08g012550</i> |
| <i>TcFAD2.1</i>  | <i>Tc05g018800</i> |
| <i>TcFAD2.2</i>  | <i>Tc01g015280</i> |
| <i>TcFAD6</i>    | <i>Tc09g002840</i> |
| <i>TcFAD7/8</i>  | <i>Tc05g002310</i> |
| <i>TcFatA</i>    | <i>Tc01g022130</i> |
| <i>TcFatB_1</i>  | <i>Tc09g010360</i> |
| <i>TcFatB_2</i>  | <i>Tc01g022130</i> |
| <i>TcFatB_5</i>  | <i>Tc03g015170</i> |
| <i>TcDGAT1.1</i> | <i>Tc09g007600</i> |
| <i>TcDGAT2</i>   | <i>Tc01g000140</i> |
| <i>TcPDAT1</i>   | <i>Tc09g029110</i> |
