# Supplementary material for: The Theobroma cacao B3 domain transcription factor TcLEC2 plays a duel role in control of embryo development and maturation
Source: PubMed Central journal article supplement (PMC4021495; doi:10.1186/1471-2229-14-106), 2014-04-24

**Additional file 9. Expression levels of genes that are not significantly affected by transient overexpression of *TcLEC2* in cacao IZE compared to control vector (n=3, mean  $\pm$  SE, significant levels were determined by t-test). The gene encoding TcWRI1 was also measured but no expression was detected.**

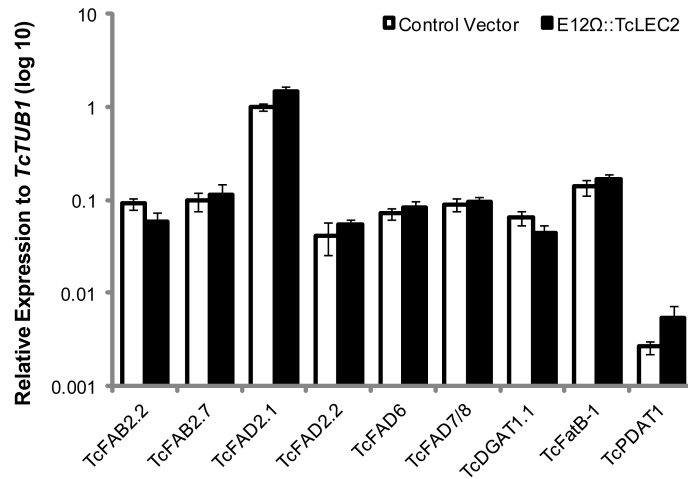

Supplement: 1471-2229-14-106-S9.pdf [file 1471-2229-14-106-S9.pdf]
